# Supplementary material for: The effect of hemiketals on the relaxivity of endohedral gadofullerenols
Source: Royal Society of Chemistry journal article supplement (doi:10.1039/c5ra16620a), 2015-01-01
Supplement: c5ra16620a1.pdf [file c5ra16620a1.pdf]

## Supporting Information

### The Effect of hemiketals on the Proton Relaxation of Endohedral Gadofullerenols

#### TABLE OF CONTENTS

Figure S1. Linear relationship between  $T_1$  relaxation rates ( $1/T_1$ ) and  $Gd^{3+}$  concentrations for  $Gd@C_{82}(OH)_{\sim 20}O_{\sim 2}$  at 7 T and 300 K.

Figure S2. Linear relationship between  $T_1$  relaxation rates ( $1/T_1$ ) and  $Gd^{3+}$  concentrations for  $Gd@C_{82}(OH)_{\sim 21}O_{\sim 7}$  at 7 T and 300 K.

Figure S3. C1s fitting XPS spectra of  $Gd@C_{82}(OH)_{\sim 15}O_{\sim 6}$ .

Figure S4. C1s fitting XPS spectra of  $Gd@C_{82}(OH)_{\sim 18}O_{\sim 8}$ .

Figure S5. Linear relationship between  $T_1$  relaxation rates ( $1/T_1$ ) and  $Gd^{3+}$  concentrations for  $Gd@C_{82}(OH)_{\sim 15}O_{\sim 6}$  in water at 0.5 T and 300 K.

Figure S6. Linear relationship between  $T_1$  relaxation rates ( $1/T_1$ ) and  $Gd^{3+}$  concentrations for  $Gd@C_{82}(OH)_{\sim 18}O_{\sim 8}$  in water at 0.5 T and 300 K.

Figure S7. Size distributions for  $Gd@C_{82}(OH)_{\sim 15}O_{\sim 6}$  (1#) and  $Gd@C_{82}(OH)_{\sim 18}O_{\sim 8}$  (2#).

Figure S8. Zeta potential distribution for  $Gd@C_{82}(OH)_{\sim 20}O_{\sim 2}$ .

Figure S9. Zeta potential distribution for  $Gd@C_{82}(OH)_{\sim 21}O_{\sim 7}$ .

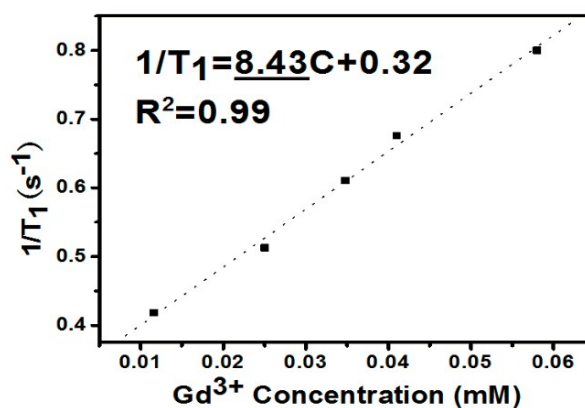

Figure S1. Linear relationship between  $T_1$  relaxation rates ( $1/T_1$ ) and  $Gd^{3+}$  concentrations for  $Gd@C_{82}(OH)_{\sim 20}O_{\sim 2}$  at 7 T and 300 K.

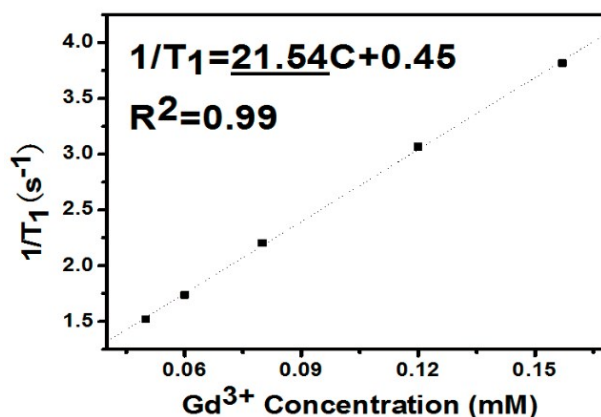

Figure S2. Linear relationship between  $T_1$  relaxation rates ( $1/T_1$ ) and  $Gd^{3+}$  concentrations for  $Gd@C_{82}(OH)_{\sim 21}O_{\sim 7}$  at 7 T and 300 K.

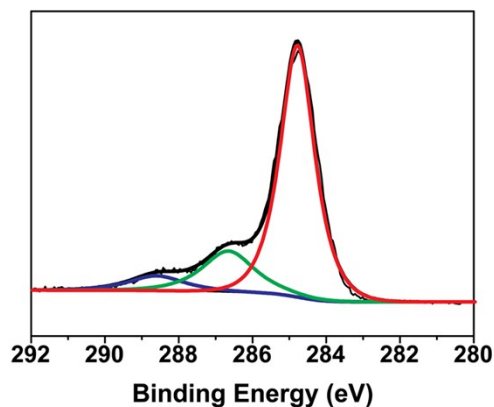

Figure S3. C1s fitting XPS spectra of  $Gd@C_{82}(OH)_{\sim 15}O_{\sim 6}$ .

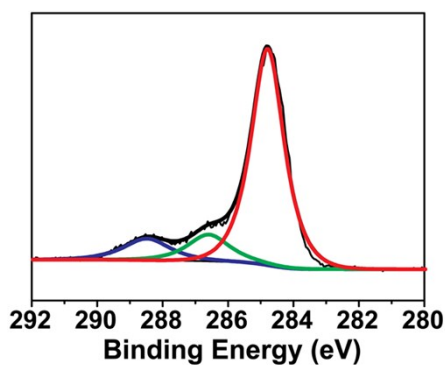

Figure S4. C1s fitting XPS spectra of  $Gd@C_{82}(OH)_{\sim 18}O_{\sim 8}$ .

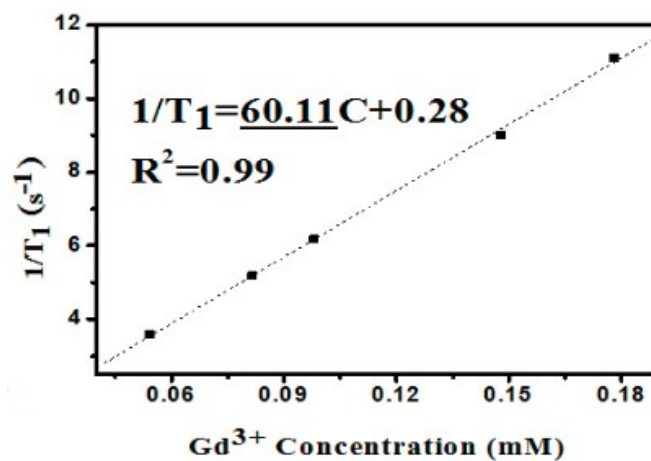

Figure S5. Linear relationship between  $T_1$  relaxation rates ( $1/T_1$ ) and  $Gd^{3+}$

concentrations for Gd@C<sub>82</sub>(OH)<sub>~15</sub>O<sub>~6</sub> in water at 0.5 T and 300 K.

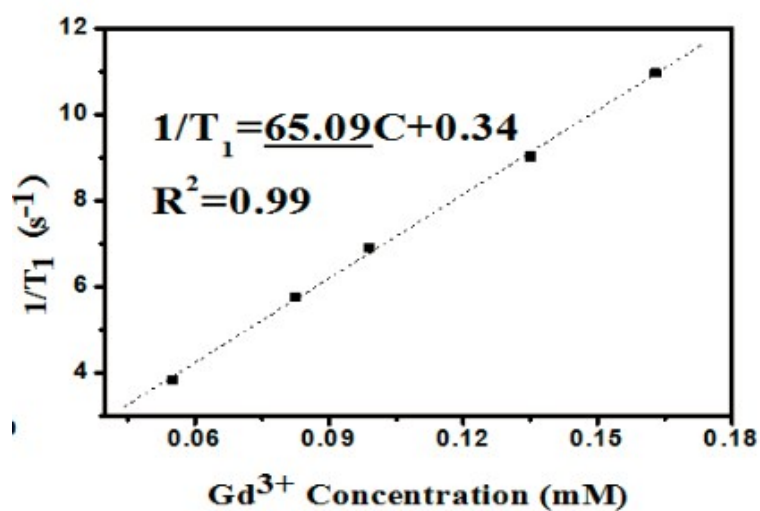

Figure S6. Linear relationship between  $T_1$  relaxation rates ( $1/T_1$ ) and Gd<sup>3+</sup> concentrations for Gd@C<sub>82</sub>(OH)<sub>~18</sub>O<sub>~8</sub> in water at 0.5 T and 300 K.

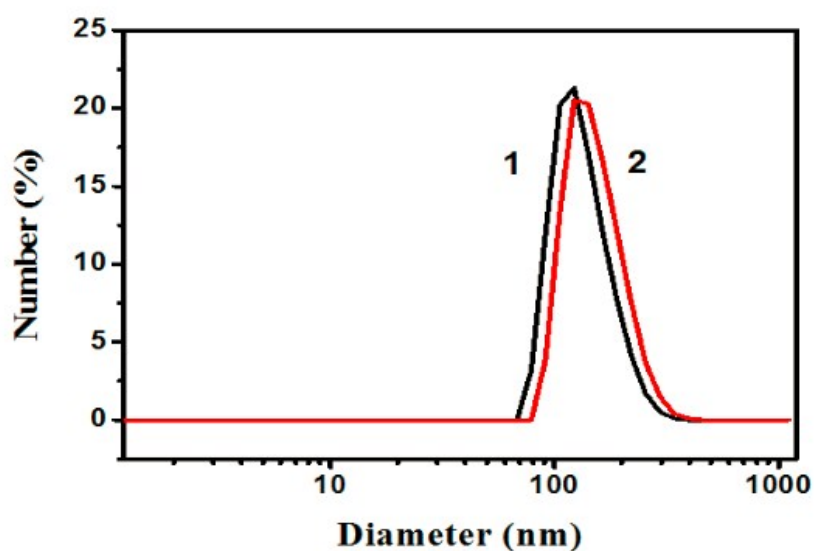

Figure S7. Size distributions for Gd@C<sub>82</sub>(OH)<sub>~15</sub>O<sub>~6</sub> (1#) and Gd@C<sub>82</sub>(OH)<sub>~18</sub>O<sub>~8</sub> (2#).

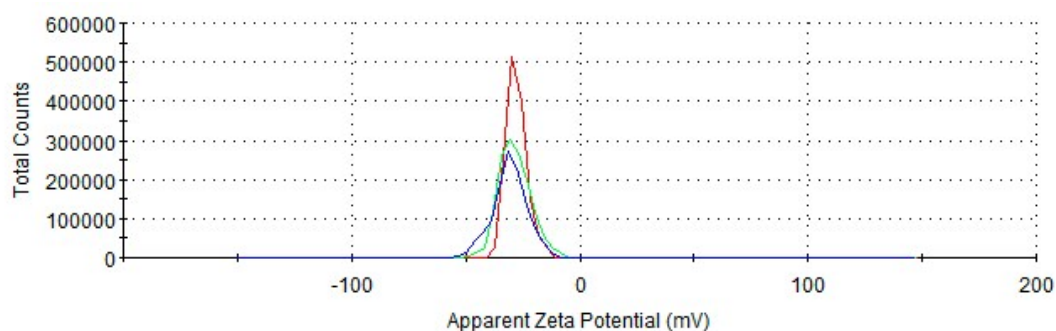

Figure S8. Zeta potential distribution for  $\text{Gd}@C_{82}(\text{OH})_{\sim 20}\text{O}_{\sim 2}$ .

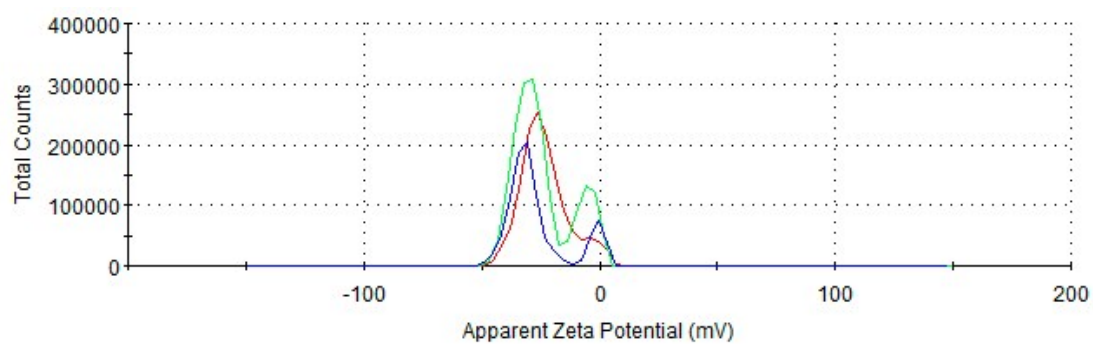

Figure S9. Zeta potential distribution for  $\text{Gd}@C_{82}(\text{OH})_{\sim 21}\text{O}_{\sim 7}$ .
